# Supplementary material
Source: PubMed Central journal article supplement (PMC3845532)
Supplement: NIHMS512695-supplement-1_si_001.pdf [file NIHMS512695-supplement-1_si_001.pdf]

## Supporting Information

### Distinct structural alterations in PCNA block DNA mismatch repair

Dieckman et al

**Figure S1.** Additional analysis of the C81R mutant PCNA protein by size exclusion chromatography. The elution profile of a size exclusion chromatography column in which solutions of the C81R mutant PCNA protein (0.01, 0.1, 1.0, and 10 mg/ml) were run are shown.

**Figure S2.** Additional sedimentation analysis of the interactions of the PCNA proteins with MutS $\alpha$  and DNA. Fractions of a glycerol gradient (15-30%) were analyzed by denaturing polyacrylamide gradient gel electrophoresis (4-15%). The fractions ranged from 1 (the bottom of the gradient) to 14 (the top of the gradient). The DNA substrate was visualized by Cy3 fluorescence, and the proteins were visualized by silver staining. The gradients contained (A) the wild-type PCNA protein alone, (B) the C22Y mutant PCNA protein alone, (C) the C81R mutant PCNA protein alone, (D) MutS $\alpha$  with the wild-type PCNA protein, (E) MutS $\alpha$  with the C22Y mutant PCNA protein, (F) MutS $\alpha$  with the C81R mutant PCNA protein, (G) MutS $\alpha$  with homoduplex DNA, (H) MutS $\alpha$  and homoduplex DNA in the presence of the wild-type PCNA protein, (I) MutS $\alpha$  and homoduplex DNA in the presence of the C22Y mutant PCNA protein, and (J) MutS $\alpha$  and homoduplex DNA in the presence of the C81R mutant PCNA protein.

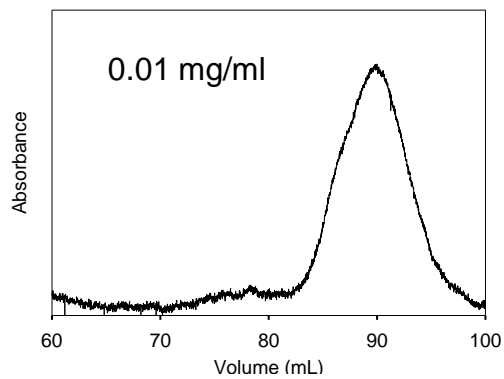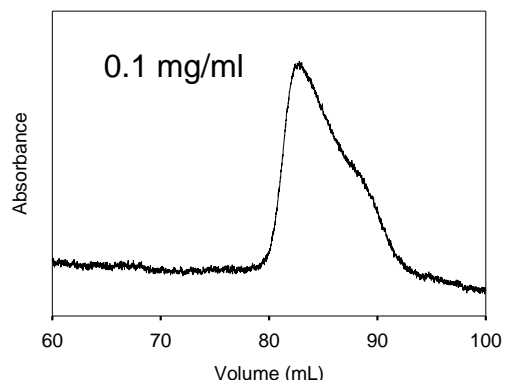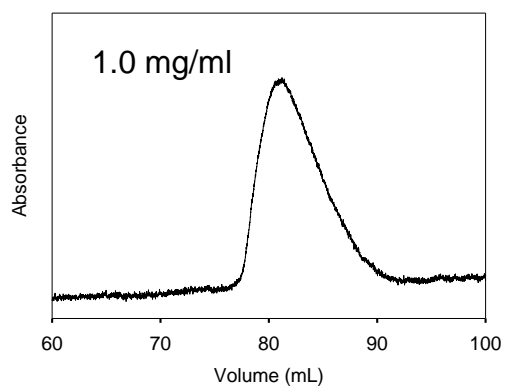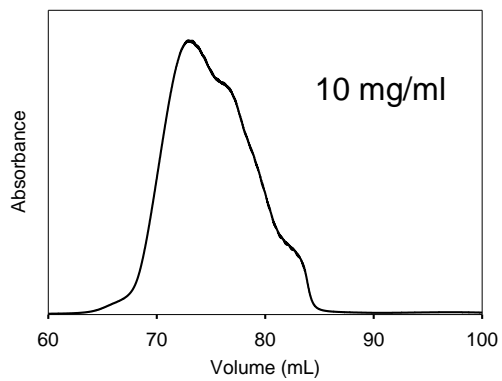

**Dieckman et al. Figure S1**

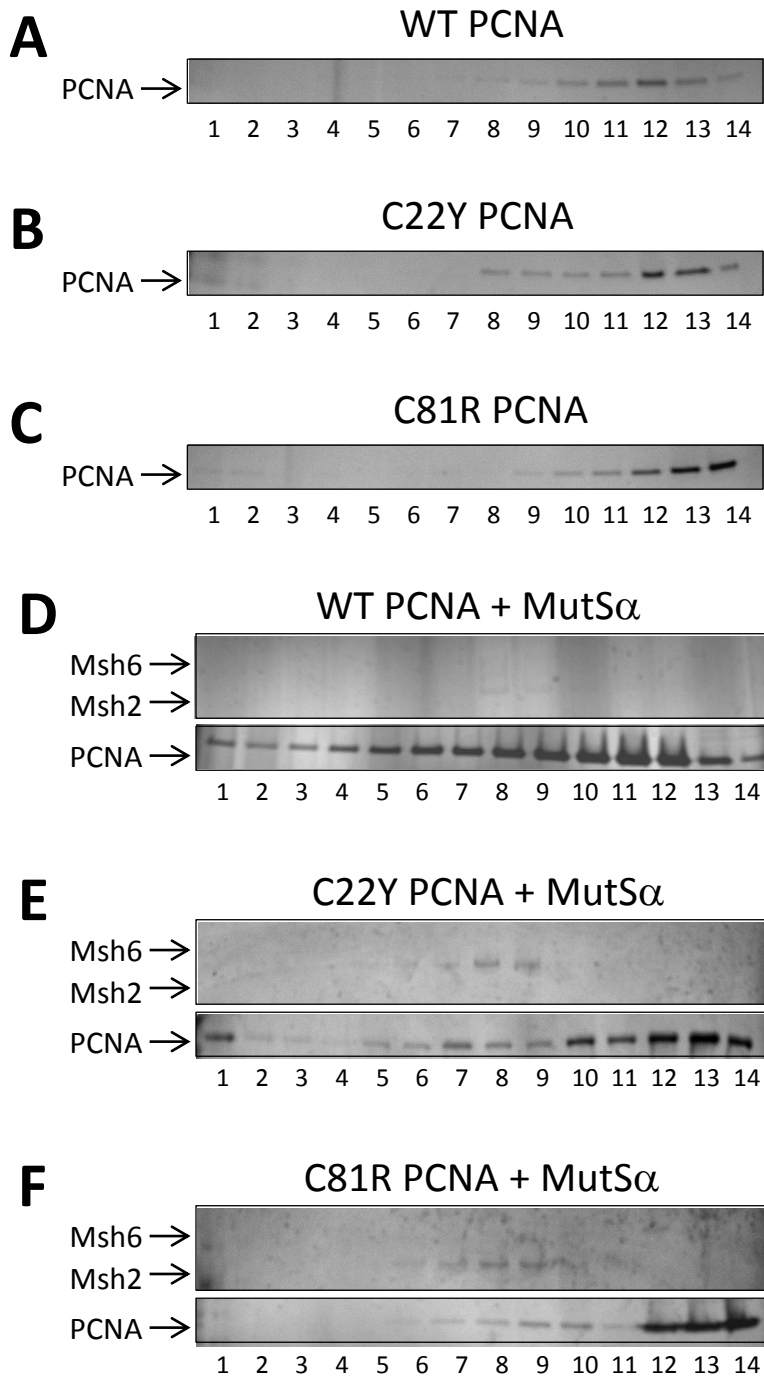

**Dieckman et al. Figure S2 (Part 1)**

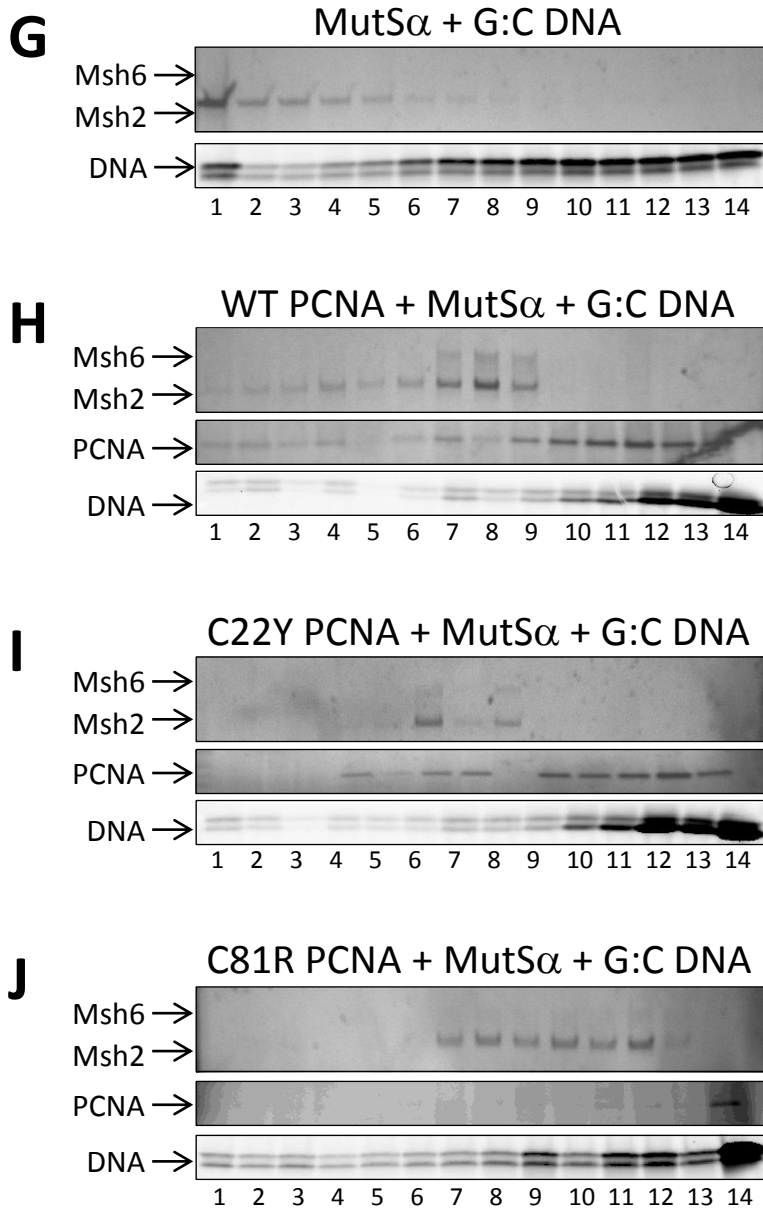

**Dieckman et al. Figure S2 (Part 2)**
